# Supplementary material
Source: PubMed Central journal article supplement (PMC4899250)
Supplement: NIHMS767110-supplement-Supp_Fig_S1.pdf [file NIHMS767110-supplement-Supp_Fig_S1.pdf]

## **Oligomerization of the Microtubule Associated Protein Tau is Mediated by its N-Terminal Sequences: Implications for Normal and Pathological Tau Action**

H. Eric Feinstein<sup>1,2,\*</sup>, Sarah J. Benbow<sup>1,2,\*</sup>, Nichole E. LaPointe<sup>1,\*</sup>, Nirav Patel<sup>3,\*</sup>, Srinivasan Ramachandran<sup>3,\*</sup>, Thanh D. Do<sup>4,6\*</sup>, Michelle R. Gaylord<sup>1,2,7</sup>, Noelle E. Huskey<sup>1,2,8</sup>, Nicolette Dressler<sup>5</sup>, Megan Korff<sup>5</sup>, Brady Quon<sup>5</sup>, Kristi Lazar Cantrell<sup>5</sup>, Michael T. Bowers<sup>4</sup>, Ratnesh Lal<sup>3,\*\*</sup>, Stuart C. Feinstein<sup>1,2,\*\*</sup>

<sup>1</sup>Neuroscience Research Institute and Department of Molecular, Cellular and Developmental Biology, University of California, Santa Barbara, CA 93106

<sup>2</sup>Department of Molecular, Cellular and Developmental Biology, University of California, Santa Barbara, CA 93106

<sup>3</sup>Department of Bioengineering, Department of Mechanical Engineering and Materials Science Graduate Program, University of California, San Diego, CA

<sup>4</sup>Department of Chemistry and Biochemistry, University of California, Santa Barbara, CA 93106

<sup>5</sup>Department of Chemistry, Westmount College, Santa Barbara, CA 93108

<sup>6</sup> Current Address: Department of Chemistry and the Beckman Institute, University of Illinois at Urbana-Champaign, Urbana, 61801.

<sup>7</sup>Current Address: Genomics Institute of the Novartis Research Foundation 10675 John Jay Hopkins Drive San Diego, 92121

<sup>8</sup>Current Address: Department of Dermatology and Program in Epithelial Biology, Stanford University School of Medicine, Stanford, California, USA.

\*Co-first authors

\*\*Co-senior authors

Corresponding Author:  
Dr. Stuart Feinstein  
Neuroscience Research Institute  
University of California  
Santa Barbara CA 93106:  
Tel: (805) 893-2659  
Fax: (805) 893-2005  
[feinstei@lifesci.ucsb.edu](mailto:feinstei@lifesci.ucsb.edu)

## **SUPPLEMENTAL MATERIALS**
